# Supplementary material
Source: PubMed Central journal article supplement (PMC6343112)
Supplement: sb8b00342_si_001.pdf [file sb8b00342_si_001.pdf]

**Less is more: towards a genome-reduced *Bacillus* cell factory for  
'difficult proteins'**

Rocío Aguilar Suárez, Jörg Stülke, Jan Maarten van Dijk

**Supplementary Figures and Tables**

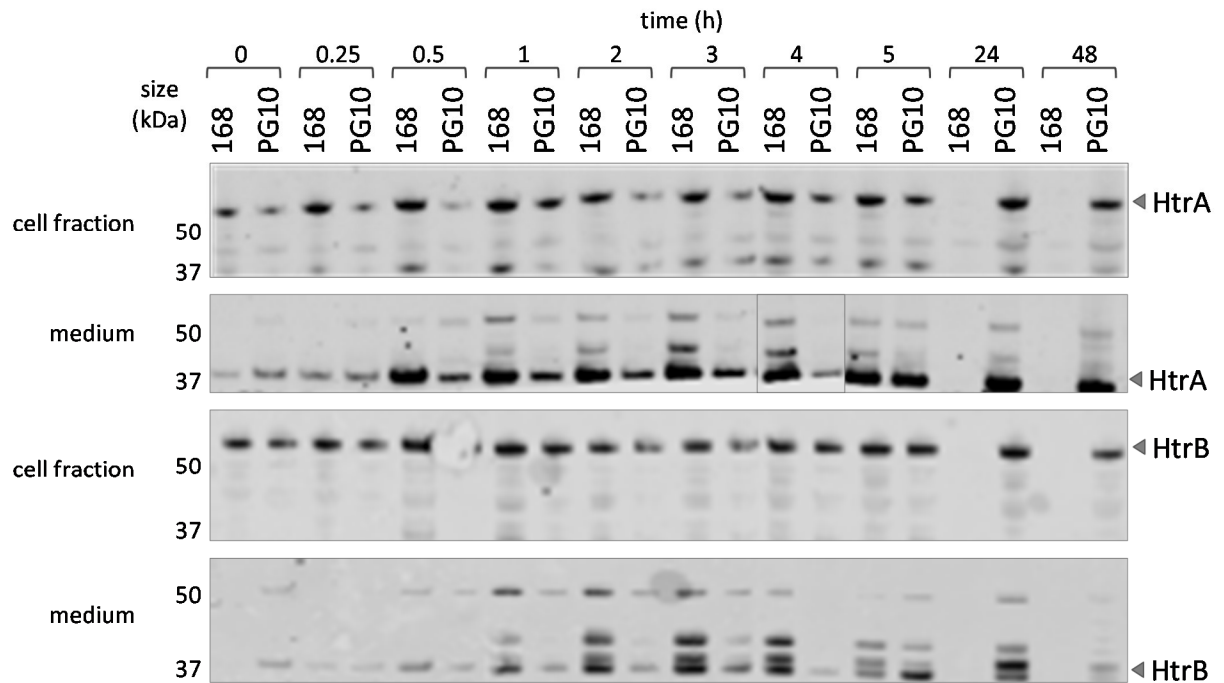

**Supplementary Figure 1. Expression of HtrA and HtrB in *B. subtilis* strains 168 and PG10 producing IsaA.** Production of IsaA in *B. subtilis* 168 and PG10 was induced with subtilin (t=0) as described for Figure 5. Samples were collected as a function of the time indicated and analyzed by Western blotting with specific antibodies for the secretion stress marker proteins HtrA and HtrB. The positions of HtrA and HtrB are marked with arrow heads.

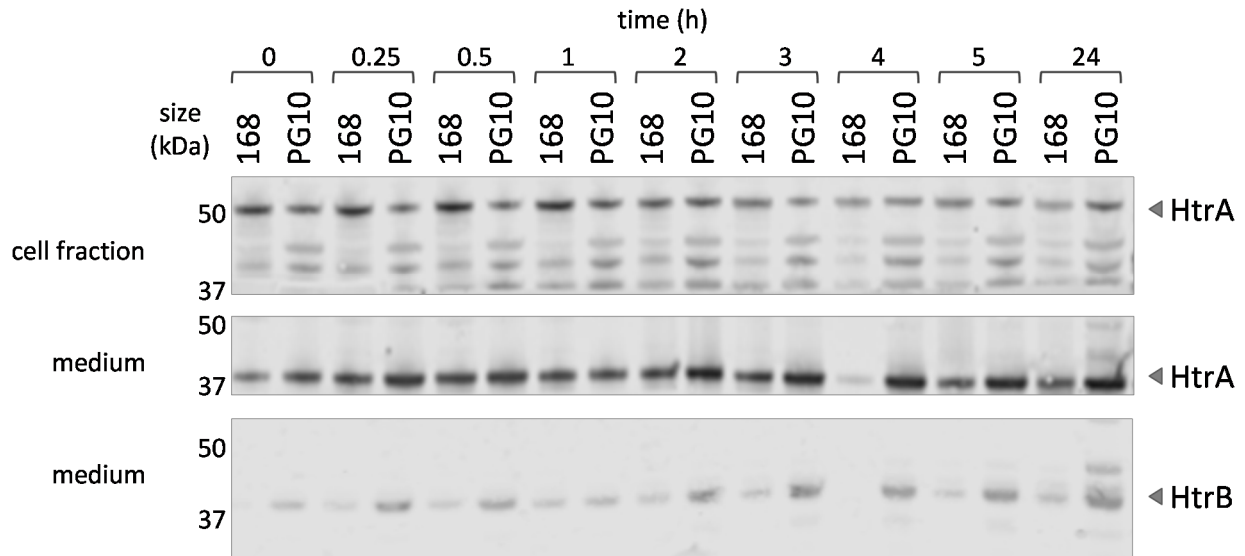

**Supplementary Figure 2. Expression of HtrA and HtrB in *B. subtilis* strains 168 and PG10 producing IsaA in the presence of protease inhibitors.**

Production of IsaA in *B. subtilis* 168 and PG10 by cells grown in the presence of the Complete protease inhibitor cocktail from Roche was induced with subtilin (t=0) as described for Figure 6. Samples were collected as a function of the time indicated and analyzed by Western blotting with specific antibodies for the secretion stress marker proteins HtrA and HtrB. The positions of HtrA and HtrB are marked with arrow heads.

**a**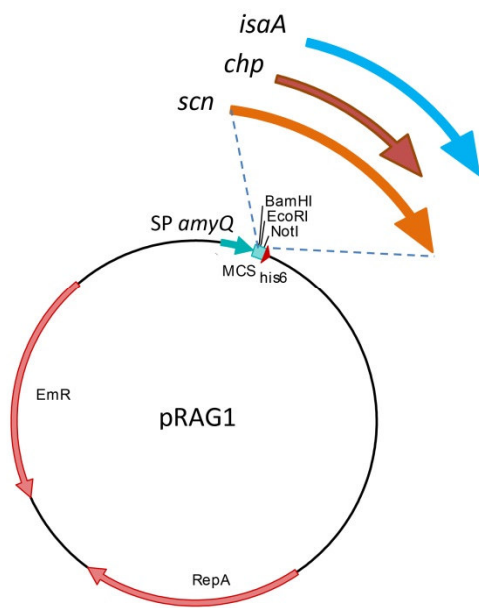**b**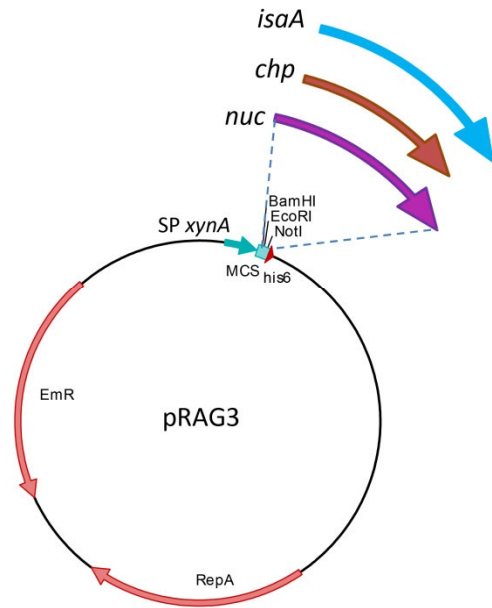

**Supplementary Figure 3. Schematic representation of plasmids pRAG1, pRAG3 and the respective derivatives for expression of *scn*, *nuc*, *chp*, or *isaA*.**

**Supplementary Table 1. Plasmids and strains used in this study.**

|                          | Relevant properties                                                                                                                                                                                                                              | Reference                                                 |
|--------------------------|--------------------------------------------------------------------------------------------------------------------------------------------------------------------------------------------------------------------------------------------------|-----------------------------------------------------------|
| <b>Plasmids</b>          |                                                                                                                                                                                                                                                  |                                                           |
| pNZ8910                  | SURE expression vector; <i>PspaS</i> <sup>a</sup>                                                                                                                                                                                                | 1                                                         |
| pNG4210:: <i>chp</i>     | pNG4210 encoding CHIPS with a C-terminal his6                                                                                                                                                                                                    | 2                                                         |
| pNG4210:: <i>SCIN</i>    | pNG4210 encoding SCIN with C-terminal his6                                                                                                                                                                                                       | 2                                                         |
| pNG4210:: <i>isaA</i>    | pNG4210 encoding <i>IsaA</i> with C-terminal his6                                                                                                                                                                                                | Laboratory collection                                     |
| pNG400:: <i>nuc</i>      | pNG400 encoding Nuc with C-terminal his6                                                                                                                                                                                                         | 3                                                         |
| pNZ8900                  | <i>amyE</i> :: <i>spaRK</i> <sup>b</sup>                                                                                                                                                                                                         | 1                                                         |
| pRAG1                    | pNZ8910 backbone; <i>SP<sub>amyQ</sub></i> , C-terminal his6                                                                                                                                                                                     | This study                                                |
| pRAG1:: <i>chp</i>       | pRAG1 encoding CHIPS                                                                                                                                                                                                                             | This study                                                |
| pRAG1:: <i>isaA</i>      | pRAG1 encoding <i>IsaA</i>                                                                                                                                                                                                                       | This study                                                |
| pRAG1:: <i>scn</i>       | pRAG1 encoding SCIN                                                                                                                                                                                                                              | This study                                                |
| pRAG3:: <i>chp</i>       | pRAG1 derivative with <i>SP<sub>xynA</sub></i> encoding CHIPS with a C-terminal his6                                                                                                                                                             | This study                                                |
| pRAG3:: <i>nuc</i>       | pRAG1 derivative with <i>SP<sub>xynA</sub></i> encoding Nuc with a C-terminal his6                                                                                                                                                               | This study                                                |
| pRAG3:: <i>isaA</i>      | pRAG1 derivative with <i>SP<sub>xynA</sub></i> encoding <i>isaA</i> with a C-terminal his6                                                                                                                                                       | This study                                                |
| pKTH10                   | UB110 derivative encoding the <i>amyQ</i> gene of <i>B. amyloliquefaciens</i> <sup>b</sup>                                                                                                                                                       | 4                                                         |
| pRMC-5' <i>bmrC</i> -gfp | pMRC carrying the upstream region of <i>bmrB</i> the 5' <i>bmrC</i> -gfp                                                                                                                                                                         |                                                           |
| <b>Strains</b>           |                                                                                                                                                                                                                                                  |                                                           |
| <i>L. lactis</i>         |                                                                                                                                                                                                                                                  |                                                           |
| MG1363                   | Plasmid-free derivative of SH4109                                                                                                                                                                                                                | 5                                                         |
| PA1001                   | MG1363 <i>pepN</i> :: <i>nisRK</i> , allows nisin-inducible expression, $\Delta$ <i>acmA</i><br>$\Delta$ <i>htrA</i>                                                                                                                             | Mucosis culture collection,<br>Groningen, The Netherlands |
| NZ9700                   | Nisin producer                                                                                                                                                                                                                                   | 6                                                         |
| <i>B. subtilis</i>       |                                                                                                                                                                                                                                                  |                                                           |
| 168                      | <i>trpc2</i>                                                                                                                                                                                                                                     | 7                                                         |
| NZ8900                   | 168, <i>amyE</i> :: <i>spaRK</i> <sup>b</sup>                                                                                                                                                                                                    | 1                                                         |
| ATCC6633                 | Subtilin producer                                                                                                                                                                                                                                | American Type Culture Collection                          |
| BRB02                    | <i>trpc2</i> , $\Delta$ <i>nprB</i> , $\Delta$ <i>aprE</i>                                                                                                                                                                                       | 8                                                         |
| BRB03                    | <i>trpc2</i> , $\Delta$ <i>nprB</i> , $\Delta$ <i>aprE</i> , $\Delta$ <i>epr</i>                                                                                                                                                                 | 8                                                         |
| BRB04                    | <i>trpc2</i> , $\Delta$ <i>nprB</i> , $\Delta$ <i>aprE</i> , $\Delta$ <i>epr</i> , $\Delta$ <i>bpr</i>                                                                                                                                           | 8                                                         |
| BRB05                    | <i>trpc2</i> , $\Delta$ <i>nprB</i> , $\Delta$ <i>aprE</i> , $\Delta$ <i>epr</i> , $\Delta$ <i>bpr</i> , $\Delta$ <i>nprE</i>                                                                                                                    | 8                                                         |
| BRB06                    | <i>trpc2</i> , $\Delta$ <i>nprB</i> , $\Delta$ <i>aprE</i> , $\Delta$ <i>epr</i> , $\Delta$ <i>bpr</i> , $\Delta$ <i>nprE</i> , $\Delta$ <i>mpr</i>                                                                                              | 8                                                         |
| BRB07                    | <i>trpc2</i> , $\Delta$ <i>nprB</i> , $\Delta$ <i>aprE</i> , $\Delta$ <i>epr</i> , $\Delta$ <i>bpr</i> , $\Delta$ <i>nprE</i> , $\Delta$ <i>mpr</i> , $\Delta$ <i>vp</i>                                                                         | 8                                                         |
| BRB08                    | <i>trpc2</i> , $\Delta$ <i>nprB</i> , $\Delta$ <i>aprE</i> , $\Delta$ <i>epr</i> , $\Delta$ <i>bpr</i> , $\Delta$ <i>nprE</i> , $\Delta$ <i>mpr</i> , $\Delta$ <i>vp</i> , $\Delta$ <i>wprA</i>                                                  | 8                                                         |
| BRB09                    | <i>trpc2</i> , $\Delta$ <i>nprB</i> , $\Delta$ <i>aprE</i> , $\Delta$ <i>epr</i> , $\Delta$ <i>bpr</i> , $\Delta$ <i>nprE</i> , $\Delta$ <i>mpr</i> , $\Delta$ <i>vp</i> , $\Delta$ <i>htrA</i>                                                  | 8                                                         |
| BRB10                    | <i>trpc2</i> , $\Delta$ <i>nprB</i> , $\Delta$ <i>aprE</i> , $\Delta$ <i>epr</i> , $\Delta$ <i>bpr</i> , $\Delta$ <i>nprE</i> , $\Delta$ <i>mpr</i> , $\Delta$ <i>vp</i> , $\Delta$ <i>htrB</i>                                                  | 8                                                         |
| BRB11                    | <i>trpc2</i> , $\Delta$ <i>nprB</i> , $\Delta$ <i>aprE</i> , $\Delta$ <i>epr</i> , $\Delta$ <i>bpr</i> , $\Delta$ <i>nprE</i> , $\Delta$ <i>mpr</i> , $\Delta$ <i>vp</i> , $\Delta$ <i>wprA</i> , $\Delta$ <i>htrA</i>                           | 8                                                         |
| BRB12                    | <i>trpc2</i> , $\Delta$ <i>nprB</i> , $\Delta$ <i>aprE</i> , $\Delta$ <i>epr</i> , $\Delta$ <i>bpr</i> , $\Delta$ <i>nprE</i> , $\Delta$ <i>mpr</i> , $\Delta$ <i>vp</i> , $\Delta$ <i>wprA</i> , $\Delta$ <i>htrB</i>                           | 8                                                         |
| BRB13                    | <i>trpc2</i> , $\Delta$ <i>nprB</i> , $\Delta$ <i>aprE</i> , $\Delta$ <i>epr</i> , $\Delta$ <i>bpr</i> , $\Delta$ <i>nprE</i> , $\Delta$ <i>mpr</i> , $\Delta$ <i>vp</i> , $\Delta$ <i>htrA</i> , $\Delta$ <i>htrB</i>                           | 8                                                         |
| BRB14                    | <i>trpc2</i> , $\Delta$ <i>nprB</i> , $\Delta$ <i>aprE</i> , $\Delta$ <i>epr</i> , $\Delta$ <i>bpr</i> , $\Delta$ <i>nprE</i> , $\Delta$ <i>mpr</i> , $\Delta$ <i>vp</i> , $\Delta$ <i>wprA</i> , $\Delta$ <i>htrA</i> ,<br>$\Delta$ <i>htrB</i> | 8                                                         |
| PG10                     | Large-scale reduction of the <i>B. subtilis</i> genome                                                                                                                                                                                           | 9                                                         |
| PS38                     | Large-scale reduction of the <i>B. subtilis</i> genome                                                                                                                                                                                           | 9                                                         |
| PG10 <i>spaRK</i>        | PG10 transformed with pNZ8900                                                                                                                                                                                                                    | This study                                                |
| BSBII-5' <i>bmrC</i> gfp | Chromosomally integrated copy of pBaSysBioII with a region of ~600<br>bp region upstream of <i>bmrC</i>                                                                                                                                          | 10                                                        |
| <i>S. aureus</i>         |                                                                                                                                                                                                                                                  |                                                           |
| ...N315                  | Hospital-acquired MRSA, Restriction-deficient                                                                                                                                                                                                    | 11                                                        |

<sup>a</sup> Erythromycin resistance cassette; <sup>b</sup> Kanamycin resistance cassette.

**Supplementary Table 2. Primers used in this study**

| Primer name | 5'->3' nucleotide sequence                              |
|-------------|---------------------------------------------------------|
| SPxynA_F    | ACGACTGATATCATGTTTAAGTTAAAAAGAATTTCTTAGTTGGATTATCGGCAGC |
| SPxynA_R    | AGTAAAGGATCCTGCAGAGGCGGTTGCCGAAAACAA                    |
| PNG42ins_F  | TTACGCTGACACAAACTCCATG                                  |
| PNG42ins_R  | TTAATGGTGATGGTGATGGTGT                                  |
| NucN315_F   | CTACTAGGGATCCATCAGTAATGTTTCGAAAGGGCAATACGCAAAG          |
| NucN315_F   | AGATGTGCGGCCGCTTATTGACCTGAATCAGCGTTGTC                  |
| SPamyQ_F    | TGACCATCATGATTCAAAAACGAAAGCGGACAG                       |
| SPamyQ_R    | GGATCCCATGGAGTTTGTGTCATTTACGGCTGATGTTTTTGTA             |
| MCS4210_F   | TACAAAAACATCAGCCGTAATGACACAAACTCCATGGGATCC              |
| MCS4210_R   | CAAAGAAAGCTTTTAATGGTGATGGTGATGGTGTGCG                   |
| PRAGwoSP_F  | ATGACACAAACTCCATGGGATCC                                 |
| PRAGwoSP_R  | ATCGATGATATCCACCTCCTTTCAATACCTAAATAG                    |

**Supplementary Table 3. Comparison of the relative copy number of plasmid pRAG3::*isaA* in *B. subtilis* 168 and PG10.** The relative copy number of the plasmid pRAG3::*isaA* was calculated as the ratio between the average coverage of plasmid and chromosomal reads. The sequencing data of the two *Bacillus* strains are available in the European Nucleotide Archive (ENA) repository.

|                               | Reference sequence   | Reference length | Consensus length | Total read count | Average coverage | Relative copy number:<br>Average coverage<br>(plasmid/genome) | Study accession | Sample accession |
|-------------------------------|----------------------|------------------|------------------|------------------|------------------|---------------------------------------------------------------|-----------------|------------------|
| PG10 +<br>pRAG3:: <i>isaA</i> | pRAG3:: <i>isaA</i>  | 4135             | 4135             | 815061           | 20685            | 107                                                           | PRJEB29683      | ERS2891774       |
|                               | CP016788<br>(PG10)   | 2759298          | 2758290          | 4693536          | 194              |                                                               |                 |                  |
| 168 +<br>pRAG3:: <i>isaA</i>  | pRAG3:: <i>isaA</i>  | 4135             | 4135             | 383669           | 9329             | 80                                                            | PRJEB29683      | ERS2891775       |
|                               | NC_000964.3<br>(168) | 4215606          | 4215233          | 4655558          | 117              |                                                               |                 |                  |

**Supplementary Table 4. Part ID's of the plasmids constructed in this study as available from the ACS Synthetic Biology registry.**

| Name                | Description                                                                              | Part ID    |
|---------------------|------------------------------------------------------------------------------------------|------------|
| pRAG1               | Expression and secretion of heterologous proteins in <i>Bacillus</i> , SPamyQ            | ACS_000757 |
| pRAG1:: <i>chp</i>  | Expression and secretion of the staphylococcal protein CHIPS in <i>Bacillus</i> , SPamyQ | ACS_000760 |
| pRAG1:: <i>isaA</i> | Expression and secretion of the staphylococcal protein IsaA in <i>Bacillus</i> , SPamyQ  | ACS_000761 |
| pRAG1:: <i>scn</i>  | Expression and secretion of the staphylococcal protein SCIN in <i>Bacillus</i> , SPamyQ  | ACS_000762 |
| pRAG3:: <i>chp</i>  | Expression and secretion of the staphylococcal protein SCIN in <i>Bacillus</i> , SPxynA  | ACS_000763 |
| pRAG3:: <i>isaA</i> | Expression and secretion of the staphylococcal protein IsaA in <i>Bacillus</i> , SPxynA  | ACS_000758 |
| pRAG3:: <i>nuc</i>  | Expression and secretion of the staphylococcal protein Nuc in <i>Bacillus</i> , SPxynA   | ACS_000764 |

The collection is available in: <https://acs-registry.jbei.org/folders/33>



## REFERENCES

- (1) Bongers, R. S., Veening, J.-W., Van Wieringen, M., Kuipers, O. P., Kleerebezem, M., Van, M., and Wieringen, M. Van. (2005) Development and characterization of a Subtilin-Regulated Expression System in *Bacillus subtilis*: strict control of gene expression by addition of subtilin. *Appl. Environ. Microbiol.* *71*, 8818–24.
- (2) Hoekstra, H., Romero Pastrana, F., Bonarius, H. P. J., van Kessel, K. P. M., Elsinga, G. S., Kooi, N., Groen, H., van Dijk, J. M., and Buist, G. (2017) A human monoclonal antibody that specifically binds and inhibits the staphylococcal complement inhibitor protein SCIN. *Virulence* *0*, 1–13.
- (3) Neef, J., Koedijk, D. G. A. M., Bosma, T., van Dijk, J. M., and Buist, G. (2014) Efficient production of secreted staphylococcal antigens in a non-lysing and proteolytically reduced *Lactococcus lactis* strain. *Appl. Microbiol. Biotechnol.* *98*, 10131–10141.
- (4) Palva, I. (1982) Molecular cloning of alfa-amylase gene from *Bacillus amyloliquefaciens* and its expression in *B. subtilis*. *Gene* *19*, 81–87.
- (5) Gasson, M. J. (1983) Plasmid complements of *Streptococcus lactis* NCDO 712 and other lactic streptococci after protoplast-induced curing. *J. Bacteriol.* *154*, 1–9.
- (6) Antelmann, H., Darmon, E., Noone, D., Veening, J. W., Westers, H., Bron, S., Kuipers, O. P., Devine, K. M., Hecker, M., and Van Dijk, J. M. (2003) The extracellular proteome of *Bacillus subtilis* under secretion stress conditions. *Mol. Microbiol.* *49*, 143–156.
- (7) Kunst, F., Ogasawara, N., Moszer, I., Albertini, A. M., Alloni, G., Azevedo, V., Bertero, M. G., Bessières, P., Bolotin, A., Borchert, S., Borriss, R., Boursier, L., Brans, A., Braun, M., Brignell, S. C., Bron, S., Brouillet, S., Bruschi, C. V., Caldwell, B., Capuano, V., Carter, N. M., Choi, S. K., Codani, J. J., Connerton, I. F., and Danchin, A. (1997) The complete genome sequence of the gram-positive bacterium *Bacillus subtilis*. *Nature* *390*, 249–256.
- (8) Pohl, S., Bhavsar, G., Hulme, J., Bloor, A. E., Misirli, G., Leckenby, M. W., Radford, D. S., Smith, W., Wipat, A., Williamson, E. D., Harwood, C. R., and Cranenburgh, R. M. (2013) Proteomic analysis of *Bacillus subtilis* strains engineered for improved production of heterologous proteins. *Proteomics* *13*, 3298–3308.
- (9) Reuß, D. R., Altenbuchner, J., Mäder, U., Rath, H., Ischebeck, T., Sappa, P. K., Thürmer, A., Guérin, C., Nicolas, P., Steil, L., Zhu, B., Feussner, I., Klumpp, S., Daniel, R., Commichau, F. M., Völker, U., and Stülke, J. (2017) Large-scale reduction of the *Bacillus subtilis* genome : consequences for the transcriptional network , resource allocation , and metabolism. *Genome Res.* *27*, 289–299.
- (10) Reilman, E., Mars, R. A. T. T., Van Dijk, J. M., and Denham, E. L. (2014) The multidrug ABC transporter BmrC/BmrD of *Bacillus subtilis* is regulated via a ribosome-mediated transcriptional attenuation mechanism. *Nucleic Acids Res.* *42*, 11393–11407.
- (11) Kuroda, M., Ohta, T., Uchiyama, I., Baba, T., Yuzawa, H., Kobayashi, I., Cui, L., Oguchi, A., Aoki, K., Nagai, Y., Lian, J., Ito, T., Kanamori, M., Matsumaru, H., Maruyama, A., Murakami, H., Hosoyama, A., Mizutani-Ui, Y., Takahashi, N. K., Sawano, T., Inoue, R., Kaito, C., Sekimizu, K., Hirakawa, H., Kuhara, S., Goto, S., Yabuzaki, J., Kanehisa, M., Yamashita, A., Oshima, K., Furuya, K., Yoshino, C., Shiba, T., Hattori, M., Ogasawara, N., Hayashi, H., and Hiramatsu, K. (2001) Whole genome sequencing of meticillin-resistant *Staphylococcus aureus*. *Lancet* *357*, 1225–40.
